# Supplementary material for: Delineation of shallow channel geometry and infill lithology using Spectral decomposition and seismic attributes: A case study from the North Sea Basin, Netherlands
Source: Copernicus journal article supplement (doi:10.5194/npg-2017-62), 2017-10-27
Supplement: Supplementary file 1 [file npg-2017-62-supplement.pdf]

## Supplementary Material

There are no supplementary material for this manuscript. The data used in this study is in the following website:

[www.dGBes.com](http://www.dGBes.com)
